# Supplementary material for: Tracing histoplasmosis genomic epidemiology and species occurrence across the USA
Source: Emerg Microbes Infect. 2024 Mar 11;13(1):2315960. doi: 10.1080/22221751.2024.2315960 (PMC10930103; doi:10.1080/22221751.2024.2315960)
Supplement: Supplementary_TablesR1 [file TEMI_A_2315960_SM9904.xlsx]

## Sheet: Supplementary Table 1
Isolate ID	SRA	Species	City	State	Source of Isolation	Country	Coverage (X)	Mating Type
1005	SRR25580055	H. ohiensis	NA	Washington	Human	USA	34.14	MAT1-1
1008	SRR25580054	H. ohiensis	NA	Indiana	Human	USA	30.86	MAT1-2
1009-H18	SRR25580061	H. ohiensis	NA	Missouri	Human	USA	31.36	MAT1-2
2134	SRR25580048	H. suramericanum	NA	Texas	Human	USA	32.39	MAT1-1
2311	SRR25580037	H. ohiensis	NA	Indiana	Environmental	USA	33.71	MAT1-2
2314	SRR25580026	H. ohiensis	NA	Indiana	Environmental	USA	22.21	MAT1-2
2317	SRR25580015	H. ohiensis	NA	Indiana	Environmental	USA	45.32	MAT1-1
2404-H77	SRR25580012	H. ohiensis	NA	Virginia	Wild mammal - Brown rat	USA	29.23	MAT1-2
2434-H84	SRR25580011	H. ohiensis	NA	Georgia	Wild mammal - Opossum	USA	31.84	MAT1-1
2436-H86	SRR25580010	H. ohiensis	NA	South Carolina	Environmental	USA	15.82	MAT1-2
2472-H97	SRR25580071	H. ohiensis	NA	Alabama	Human	USA	27.13	MAT1-2
2767-H130	SRR25580070	H. ohiensis	NA	Alabama	Human	USA	28.09	MAT1-2
B02529	SRR25580069	H. ohiensis	Parrott	Georgia	Environmental	USA	41.46	MAT1-1
B02798	SRR25580068	H. ohiensis	NA	Louisiana	Environmental	USA	46.92	MAT1-1
B04440	SRR25580067	H. ohiensis	NA	Tennessee	Environmental	USA	32.08	MAT1-1
B04443	SRR25580066	H. ohiensis	Greenwood	Mississippi	Unknown	USA	54.41	MAT1-1
B04447	SRR25580065	H. ohiensis	Dumas	Arkansas	Unknown	USA	32.24	MAT1-2
B05316	SRR25580064	H. mississippiensis I	Denver	Colorado	Human	USA	32.58	MAT1-2
B05371	SRR25580063	H. mississippiensis I	NA	Kansas	Human	USA	45.63	MAT1-1
B05474	SRR25580062	H. ohiensis	NA	Montana	Human	USA	44.85	MAT1-2
B05581	SRR25580060	H. ohiensis	NA	Georgia	Human	USA	41.24	MAT1-2
B05583	SRR25580059	H. ohiensis	NA	Georgia	Human	USA	37.58	MAT1-1
B05614	SRR25580058	H. suramericanum	NA	NA	Human	India	33.4	MAT1-2
B05822	SRR25580057	H. mississippiensis II	NA	Indiana	Human	USA	56.78	MAT1-2
B06278	SRR25580056	H. ohiensis	Shelbyville	Indiana	Environmental	USA	55.9	MAT1-2
B06279	SRR25580053	H. ohiensis	Shelbyville	Indiana	Environmental	USA	41.37	MAT1-1
B06301	SRR25580052	H. ohiensis	Shelbyville	Indiana	Environmental	USA	30.6	MAT1-2
B06377	SRR25580051	H. ohiensis	Shelbyville	Indiana	Environmental	USA	40.85	MAT1-1
B06378	SRR25580050	H. mississippiensis I	Shelbyville	Indiana	Environmental	USA	32.27	MAT1-1
B06553	SRR25580049	H. ohiensis	NA	NA	Unknown	USA	45.29	MAT1-1
B06895	SRR25580047	H. ohiensis	NA	Virginia	Human	USA	32.22	MAT1-2
B08830	SRR25580046	H. ohiensis	Atlanta	Georgia	Human	USA	55.98	MAT1-1
B08855	SRR25580045	H. ohiensis	Davis	California	Cat	USA	53.05	MAT1-1
B09607	SRR25580044	H. ohiensis	Atlanta	Georgia	Human	USA	40.9	MAT1-2
B10265	SRR25580043	H. suramericanum	Richmond	California	Human	USA	45.19	MAT1-2
B10349	SRR25580042	H. ohiensis	Bismark	North Dakota	Human	USA	48.88	MAT1-2
B10351	SRR25580041	H. ohiensis	Raleigh	North Carolina	Human	USA	40.89	MAT1-1
B10816	SRR25580040	H. mississippiensis I	NA	California	Human	USA	34.23	MAT1-2
B10907	SRR25580039	H. ohiensis	Atlanta	Georgia	Human	USA	26.3	MAT1-2
B10920	SRR25580038	H. ohiensis	Atlanta	Georgia	Human	USA	32.19	MAT1-2
B11020	SRR25580036	H. ohiensis	Atlanta	Georgia	Human	USA	34.57	MAT1-2
B11242	SRR25580035	H. ohiensis	Bismark	North Dakota	Human	USA	39.02	MAT1-2
B11298	SRR25580034	H. ohiensis	Montgomery	Alabama	Human	USA	56.35	MAT1-1
B11303	SRR25580033	H. ohiensis	Atlanta	Georgia	Human	USA	19.44	MAT1-2
B11347	SRR25580032	H. ohiensis	NA	Ohio	Human	USA	33.96	MAT1-2
B11773	SRR25580031	H. ohiensis	Reynoldsburg	Ohio	Human	USA	37.33	MAT1-2
B12410-1	SRR25580030	H. mississippiensis I	Stillwater	Oklahoma	Cat	USA	47.6	MAT1-1
B12410-2	SRR25580029	H. mississippiensis I	Stillwater	Oklahoma	Cat	USA	22.14	MAT1-1
B12411	SRR25580028	H. mississippiensis I	Stillwater	Oklahoma	Cat	USA	21.88	MAT1-1
B13424	SRR25580027	H. mississippiensis I	Stillwater	Oklahoma	Dog	USA	51.51	MAT1-2
B13425	SRR25580025	H. mississippiensis I	Stillwater	Oklahoma	Dog	USA	45.91	MAT1-2
B13435	SRR25580024	H. mississippiensis I	Stillwater	Oklahoma	Dog	USA	34.63	MAT1-2
B13438	SRR25580023	H. mississippiensis I	Stillwater	Oklahoma	Cat	USA	63.11	MAT1-2
B15141	SRR25580022	H. mississippiensis I	Stillwater	Oklahoma	Cat	USA	102.7	MAT1-2
B15376	SRR25580021	H. mississippiensis I	Stillwater	Oklahoma	Cat	USA	44.63	MAT1-2
B15413	SRR25580020	H. mississippiensis I	Stillwater	Oklahoma	Dog	USA	43.3	MAT1-2
B15414	SRR25580019	H. mississippiensis I	Stillwater	Oklahoma	Dog	USA	45.93	MAT1-2
B15421	SRR25580018	H. ohiensis	Stillwater	Oklahoma	Dog	USA	46.03	MAT1-1
B15422	SRR25580017	H. mississippiensis I	Stillwater	Oklahoma	Cat	USA	67.7	MAT1-1
B15423	SRR25580016	H. mississippiensis I	Stillwater	Oklahoma	Cat	USA	60.56	MAT1-1
B15424	SRR25580014	H. mississippiensis I	Stillwater	Oklahoma	Cat	USA	55.25	MAT1-2
B9348	SRR25580013	H. ohiensis	NA	Georgia	Human	USA	27.65	MAT1-2
NAM1 (reference)		H. mississippiensis II	NA	NA	Human	USA	-	MAT1-1
Downs	SRR6243662	H. mississippiensis II	NA	Missouri	Human	USA	50.68	MAT1-1
G217B	SRR6243661	H. ohiensis	NA	Louisiana	Human	USA	34.74	MAT1-1
G222B	SRR6243660	H. ohiensis	NA	Louisiana	Human	USA	43.29	MAT1-1
CI-6	SRR6243659	H. ohiensis	NA	Missouri	Human	USA	78.29	MAT1-1
CI-9	SRR6243658	H. ohiensis	NA	Missouri	Human	USA	51.8	MAT1-1
CI-10	SRR6243657	H. ohiensis	NA	Missouri	Human	USA	44.27	MAT1-2
CI-17	SRR6243656	H. ohiensis	NA	Missouri	Human	USA	34.85	MAT1-2
CI-18	SRR6243655	H. ohiensis	NA	Missouri	Human	USA	46.8	MAT1-2
CI-30	SRR6243654	H. ohiensis	NA	Missouri	Human	USA	40.18	MAT1-1
CI-35	SRR6243653	H. ohiensis	NA	Missouri	Human	USA	48.02	MAT1-2
Mv3	SRR6243652	H. capsulatum	NA	NA	Human	Colombia	111.11	MAT1-1
Hc1986	SRR6243651	H. ohiensis	NA	NA	Human	Colombia	111.61	MAT1-1
G186A	SRR6243650	H. capsulatum	NA	NA	Human	Panama	65.71	MAT1-2
MZ-5	SRR6243649	H. suramericanum	NA	NA	Human	Colombia	98.52	MAT1-2
505	SRR6243648	H. mississippiensis II	NA	NA	Human	NA	55.1	MAT1-1
G184A	SRR6243647	H. capsulatum	NA	NA	Human	Panama	49.1	MAT1-2
27-14	SRR6243646	H. suramericanum	NA	NA	Human	Guatemala	51.32	MAT1-2
2020-03-11	SRR6243645	H. suramericanum	NA	NA	Human	Guatemala	43.8	MAT1-1
duboisii_A	SRR6243644	Africa	NA	NA	Human	Africa	34.17	MAT1-2
21-14	SRR6243643	H. suramericanum	NA	NA	Human	Guatemala	74.39	MAT1-1
UCLA_531	SRR6243642	H. mississippiensis I	NA	California	Human	USA	47.4	MAT1-1
CI-43	SRR6243641	H. mississippiensis II	NA	Missouri	Human	USA	72.15	MAT1-1
WU-24	SRR6243640	H. mississippiensis II	NA	Missouri	Human	USA	48.7	MAT1-1
duboisii_B	SRR6243639	Africa	NA	NA	Human	Africa	40.12	MAT1-2
CI-7	SRR6243638	H. mississippiensis II	NA	Missouri	Human	USA	100.75	MAT1-1
CI-4	SRR6243637	H. ohiensis	NA	Missouri	Human	USA	59.97	MAT1-2
CI-22	SRR6243636	H. mississippiensis II	NA	Missouri	Human	USA	81.2	MAT1-2
CI-19	SRR6243635	H. mississippiensis II	NA	Missouri	Human	USA	53.35	MAT1-2
CI-42	SRR6243634	H. mississippiensis II	NA	Missouri	Human	USA	51.26	MAT1-1
CI-24	SRR6243633	H. mississippiensis II	NA	Missouri	Human	USA	62.79	MAT1-1

## Sheet: Supplementary Table 2
Isolate ID	Species	Latitude	Longitude	State	Reference
B02529	H. ohiense	31.89554	-84.511909	Georgia	This study
B04443	H. ohiense	33.521469	-90.192848	Mississippi	This study
B04447	H. ohiense	33.887161	-91.491791	Arkansas	This study
B06278	H. ohiense	39.521439	-85.776924	Indiana	This study
B06279	H. ohiense	39.521439	-85.776924	Indiana	This study
B06301	H. ohiense	39.521439	-85.776924	Indiana	This study
B06377	H. ohiense	39.521439	-85.776924	Indiana	This study
B08830	H. ohiense	34.899531	-85.537188	Georgia	This study
B08855	H. ohiense	38.546719	-121.744339	California	This study
B09607	H. ohiense	34.375262	-84.658282	Georgia	This study
B10349	H. ohiense	46.808327	-100.783737	North Dakota	This study
B10351	H. ohiense	35.779591	-78.638176	North Carolina	This study
B10907	H. ohiense	34.30269	-83.625567	Georgia	This study
B10920	H. ohiense	33.096228	-84.043048	Georgia	This study
B11020	H. ohiense	31.311495	-82.878497	Georgia	This study
B11242	H. ohiense	46.808327	-100.783737	North Dakota	This study
B11298	H. ohiense	32.379223	-86.307739	Alabama	This study
B11303	H. ohiense	31.736887	-83.177101	Georgia	This study
B11773	H. ohiense	39.954632	-82.801697	Ohio	This study
B15421	H. ohiense	36.110168	-97.058571	Oklahoma	This study
CI_35	H. ohiense	40.322.202	-95.191712	Missouri	This study
2472-H97	H. ohiense	34.908178	-88.024355	Alabama	This study
2767/H130	H. ohiense	34.374897	-87.260805	Alabama	This study
2434/H84	H. ohiense	34.538948	-84.602221	Georgia	This study
B05581	H. ohiense	33.207242	-83.503588	Georgia	This study
B05583	H. ohiense	33.647353	-82.602709	Georgia	This study
B9348	H. ohiense	31.462204	-84.492357	Georgia	This study
1008	H. ohiense	38.032774	-87.491238	Indiana	This study
2311	H. ohiense	38.119257	-87.079251	Indiana	This study
2314	H. ohiense	38.145182	-86.387112	Indiana	This study
2317	H. ohiense	38.322091	-85.925686	Indiana	This study
B02798	H. ohiense	29.849317	-93.749768	Louisiana	This study
G217B	H. ohiense	30.229742	-92.90382	Louisiana	This study
G222B	H. ohiense	30.542489	-90.805432	Louisiana	This study
1009/H18	H. ohiense	40.288689	-94.554505	Missouri	This study
CI_6	H. ohiense	39.445469	-94.137025	Missouri	This study
CI_9	H. ohiense	39.071175	-94.356751	Missouri	This study
CI_10	H. ohiense	38.247614	-94.466615	Missouri	This study
CI_17	H. ohiense	39.614942	-91.676087	Missouri	This study
CI_18	H. ohiense	38.505994	-90.907044	Missouri	This study
CI_30	H. ohiense	38.626255	-90.819154	Missouri	This study
CI_4	H. ohiense	38.78058	-92.02765	Missouri	This study
B05474	H. ohiense	48.121725	-113.17553	Montana	This study
B11347	H. ohiense	40.084958	-83.756221	Ohio	This study
2436/H86	H. ohiense	33.759135	-81.014591	South Carolina	This study
B04440	H. ohiense	35.994784	-85.367765	Tennessee	This study
2404/H77	H. ohiense	36.641389	-83.139589	Virginia	This study
B06895	H. ohiense	38.268021	-78.239557	Virginia	This study
1005	H. ohiense	46.773832	-122.913741	Washington	This study
H2	H. ohiense	31.349682	-84.821947	Georgia	Kasuga et al
H5	H. ohiense	38.446961	-86.271756	Indiana	Kasuga et al
H6	H. ohiense	38.47277	-87.167141	Indiana	Kasuga et al
1003/H11	H. ohiense	38.574739	-92.796693	Missouri	Kasuga et al
1019/H18	H. ohiense	38.230356	-92.928529	Missouri	Kasuga et al
H138	H. ohiense	35.52947	-94.309716	Arkansas	Kasuga et al
H139	H. ohiense	35.422108	-90.49746	Arkansas	Kasuga et al
1006	H. ohiense	38.511465	-85.49722	Indiana	Teodoro et al
1015	H. ohiense	38.623134	-86.238797	Indiana	Teodoro et al
1017	H. ohiense	38.627426	-85.623562	Indiana	Teodoro et al
2304	H. ohiense	38.653169	-87.52969	Indiana	Teodoro et al
2305	H. ohiense	38.696055	-86.936429	Indiana	Teodoro et al
2306	H. ohiense	38.935739	-85.096219	Indiana	Teodoro et al
2308	H. ohiense	39.046746	-86.052029	Indiana	Teodoro et al
2309	H. ohiense	39.161839	-85.118191	Indiana	Teodoro et al
2310	H. ohiense	39.208675	-86.293728	Indiana	Teodoro et al
2312	H. ohiense	39.387215	-85.35989	Indiana	Teodoro et al
2313	H. ohiense	39.501750	-86.398098	Indiana	Teodoro et al
2315	H. ohiense	39.514464	-86.66177	Indiana	Teodoro et al
2316	H. ohiense	39.548358	-85.096219	Indiana	Teodoro et al
2318	H. ohiense	39.624559	-86.299222	Indiana	Teodoro et al
2319	H. ohiense	39.65417	-86.628811	Indiana	Teodoro et al
2320	H. ohiense	39.747151	-84.887478	Indiana	Teodoro et al
2321	H. ohiense	39.764043	-86.030056	Indiana	Teodoro et al
2322	H. ohiense	39.814694	-86.716702	Indiana	Teodoro et al
2323	H. ohiense	40.155616	-85.337918	Indiana	Teodoro et al
2324	H. ohiense	40.465587	-86.90347	Indiana	Teodoro et al
2325	H. ohiense	40.494834	-86.947415	Indiana	Teodoro et al
2326	H. ohiense	40.68378	-84.915434	Indiana	Teodoro et al
2473	H. ohiense	34.651005	-85.711733	Alabama	Teodoro et al
2474	H. ohiense	33.664641	-86.250063	Alabama	Teodoro et al
2475	H. ohiense	33.60061	-86.211611	Alabama	Teodoro et al
2476	H. ohiense	32.950793	-85.322908	Alabama	Teodoro et al
2477	H. ohiense	32.470106	-85.718416	Alabama	Teodoro et al
2478	H. ohiense	32.576635	-86.542391	Alabama	Teodoro et al
2479	H. ohiense	31.507585	-85.152478	Alabama	Teodoro et al
2480	H. ohiense	31.169779	-85.883069	Alabama	Teodoro et al
2481	H. ohiense	31.713423	-86.415906	Alabama	Teodoro et al
2772	H. ohiense	40.767039	-86.316191	Indiana	Teodoro et al
2753	H. ohiense	34.932576	-88.018969	Alabama	Teodoro et al
2754	H. ohiense	34.426643	-87.249926	Alabama	Teodoro et al
2755	H. ohiense	34.64385	-85.667894	Alabama	Teodoro et al
2756	H. ohiense	34.932576	-86.414965	Alabama	Teodoro et al
2757	H. ohiense	33.497222	-87.030199	Alabama	Teodoro et al
2758	H. ohiense	31.944493	-87.996996	Alabama	Teodoro et al
2759	H. ohiense	31.925846	-87.86516	Alabama	Teodoro et al
2760	H. ohiense	31.664391	-87.096117	Alabama	Teodoro et al
2762	H. ohiense	31.888541	-86.45891	Alabama	Teodoro et al
2764	H. ohiense	32.613257	-85.733812	Alabama	Teodoro et al
2765	H. ohiense	33.01951	-85.316332	Alabama	Teodoro et al
2766	H. ohiense	33.935862	-85.448168	Alabama	Teodoro et al
2768	H. ohiense	31.739168	-85.250414	Alabama	Teodoro et al
2769	H. ohiense	31.289605	-85.360277	Alabama	Teodoro et al
2770	H. ohiense	31.176877	-85.887621	Alabama	Teodoro et al
2773	H. ohiense	40.80863	-87.359892	Indiana	Teodoro et al
2774	H. ohiense	41.007902	-86.914946	Indiana	Teodoro et al
2775	H. ohiense	41.090755	-85.525175	Indiana	Teodoro et al
2776	H. ohiense	41.144347	-85.926688	Indiana	Teodoro et al
2777	H. ohiense	41.529982	-84.998344	Indiana	Teodoro et al
2778	H. ohiense	41.591637	-87.343925	Indiana	Teodoro et al
B05316	H. mississippiense I	39.739235	-104.99025	Colorado	This study
B06378	H. mississippiense I	39.521439	-85.776924	Indiana	This study
B10816	H. mississippiense I	36.206415	-120.248828	California	This study
B12410-1	H. mississippiense I	36.110168	-97.058571	Oklahoma	This study
B12410-2	H. mississippiense I	36.110168	-97.058571	Oklahoma	This study
B12411	H. mississippiense I	36.110168	-97.058571	Oklahoma	This study
B13424	H. mississippiense I	36.110168	-97.058571	Oklahoma	This study
B13425	H. mississippiense I	36.110168	-97.058571	Oklahoma	This study
B13435	H. mississippiense I	36.110168	-97.058571	Oklahoma	This study
B13438	H. mississippiense I	36.110168	-97.058571	Oklahoma	This study
B15141	H. mississippiense I	36.110168	-97.058571	Oklahoma	This study
B15376	H. mississippiense I	36.110168	-97.058571	Oklahoma	This study
B15413	H. mississippiense I	36.110168	-97.058571	Oklahoma	This study
B15414	H. mississippiense I	36.110168	-97.058571	Oklahoma	This study
B15422	H. mississippiense I	36.110168	-97.058571	Oklahoma	This study
B15423	H. mississippiense I	36.110168	-97.058571	Oklahoma	This study
B15424	H. mississippiense I	36.110168	-97.058571	Oklahoma	This study
B05822	H. mississippiense II	41.692212	-85.621818	Indiana	This study
B05371	H. mississippiense I	39.271548	-99.212376	Kansas	This study
Downs	H. mississippiense II	37.901674	-92.093568	Missouri	This study
505	H. mississippiense II	35.396729	-91.282846	Arkansas	This study
UCLA_531	H. mississippiense I	36.074542	-119.452703	California	This study
CI_43	H. mississippiense II	37.86699	-92005677	Missouri	This study
WU-24	H. mississippiense II	38.299364	-91.807923	Missouri	This study
CI_7	H. mississippiense II	38.022939	-90.313783	Missouri	This study
CI_22	H. mississippiense II	36.625168	-89.368958	Missouri	This study
CI_19	H. mississippiense II	36.801309	-90.138001	Missouri	This study
CI_42	H. mississippiense II	36.854072	-90.665345	Missouri	This study
CI_24	H. mississippiense II	37.814933	-93.52179	Missouri	This study
2428/H79	H. mississippiense	30.916451	-81.845782	Georgia	Kasuga et al
H126	H. mississippiense	37.48439	-93.653626	Missouri	Kasuga et al
H127	H. mississippiense	36.607532	-94.444642	Missouri	Kasuga et al
1001	H. mississippiense	48.926206	-117.222823	Washington	Teodoro et al
2212	H. mississippiense	32.42599	-99.859774	Texas	Teodoro et al
2763	H. mississippiense	31.79283	-87.866101	Alabama	Teodoro et al
2771	H. mississippiense	41.727068	-86.116202	Indiana	Teodoro et al
TX-1	H. mississippiense	26.066279	-97.310946	Texas	Balajee et al
CO-3	H. mississippiense	37.789271	-108.674694	Colorado	Balajee et al
CA-2	H. mississippiense	34.493308	-114.483012	California	Balajee et al
CO-2	H. mississippiense	37.091441	-106.565319	Colorado	Balajee et al
CA-1b	H. mississippiense	35.608513	-120.064067	California	Balajee et al
CO-1	H. mississippiense	38.549343	-103.599011	Colorado	Balajee et al
CA-1a	H. mississippiense	40.951168	-120.942973	California	Balajee et al
	H. ohiense
